# Supplementary material
Source: Springer Nature journal article supplement (https://www.springermedizin.de/resource/supplementary/13063_2010_676_MOESM1_ESM.pdf/9618462)
Supplement: MOESM1 [file 9618462]

# Entry criteria for pilot feasibility and safety study of a simple, low cost method of whole body cooling in neonatal encephalopathy in the Special Care Baby Unit, Mulago Hospital, Kampala

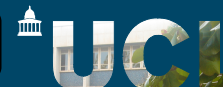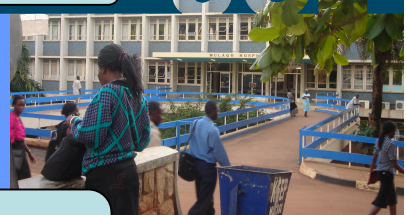

Is baby > 36 weeks old and has a birthweight > 2000g

Yes

No

Excluded

Included

Was there need for resuscitation with assisted bag and mask ventilation and/or APGAR score of < 6 at 5 minutes (10 minutes if available)

Included

Yes

No

Is the neurological assessment (Thompson score) > 5

Yes

No

Excluded

Included

Was onset of regular breathing delayed > 20min, and/or did the infant remain apnoeic or cyanotic, and/or had no cardiac output

Yes

Excluded

No

Included

Is the baby outborn?

No

Included

Yes

Excluded

Does the family understand english or luganda?

No

Excluded

Yes

Included

Is there any major malformation?

Included

No

Yes

Is the baby more than 3 hrs old at randomisation

No

Included

Yes

Excluded

Is there any symptomatic infection?

Yes

Excluded

No

Included

Does the family live > 20km of radius of Mulago Hospital

**INCLUDE IN STUDY AND RANDOMISE**

No

Yes

Excluded
